# Present Your Medically Challenging Cases at the ANESTHESIOLOGY® 2016 ANNUAL MEETING

Submission Deadline: **May 24, 2016** (11:59 p.m. CST)

The Medically Challenging Cases sessions provide attendees and residents the opportunity to present interesting and challenging cases they have managed in their own practice. This section has continued to be a resounding success, and each year the number of presentations has grown, with more than 1,400 poster sessions presented at the 2015 annual meeting. Discussion is very lively at the poster presentations, and each year the committee has worked to provide the most interactive and educational experience possible. In 2015, the moderated discussions were enhanced to provide increased time for interaction among the moderators, presenters and attendees, which promoted more in-depth discussion, feedback and a comprehensive educational experience. Medically Challenging Cases were presented using an electronic format where each session was moderated by an expert physician faculty member. Each session was overseen by a member of the Committee on Scientific and Educational Exhibits.

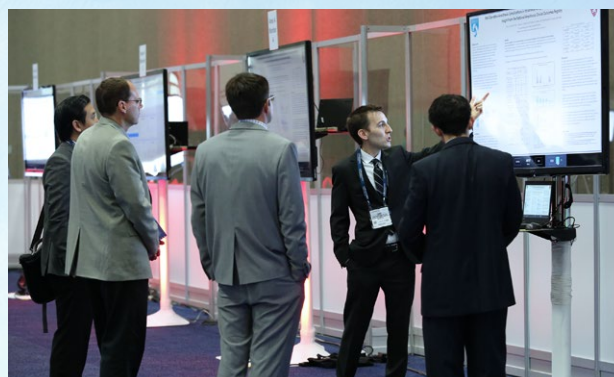

Participate in the ANESTHESIOLOGY® 2016 annual meeting in Chicago by submitting your interesting case for presentation. Medically Challenging Case submissions are open to the public and must be submitted online through [www.goanesthesiology.org](http://www.goanesthesiology.org). ASA members may submit their cases for free. Watch for the submission site to open on **February 16, 2016 and run through May 24, 2016.**

## IN MEMORIAM

Bashir Ahmad, M.D.  
Ballwin, Missouri  
October 15, 2015

Christopher D. Robert, D.O.  
Minneapolis, Minnesota  
December 5, 2015

Stewart A. Wilber, M.D.  
San Antonio, Texas  
January 19, 2015

Steven M. Anderson, M.D.  
Virginia Beach, Virginia  
October 15, 2015

Christian K. Spiss, M.D.  
July 26, 2015  
Vienna, Austria

Ruben S. Zabaleta, M.D.  
Longwood, Florida  
July 27, 2015

Daniel C. Moore M.D.  
Seattle, Washington  
September 6, 2015

Roger L. Westerlund, M.D.  
Key West, Florida  
July 6, 2015

Andrew L. Zimet, M.D.  
Whitefish, Montana  
July 3, 2015
